# Supplementary material for: Engineering C 60 ‖B 60 heterostructure for high performance electro-optic response: a theoretical performance study
Source: Royal Society of Chemistry journal article supplement (doi:10.1039/d5cp04105h), 2026-01-01
Supplement: d5cp04105h1.pdf [file d5cp04105h1.pdf]

Table S1. Detailed Computational Parameters used in Quantum Espresso

| Parameter                                 | Value / Setting               | Description                                     |
|-------------------------------------------|-------------------------------|-------------------------------------------------|
| General & DFT (Ground state)              |                               |                                                 |
| Codes                                     | pw.x, bands.x                 | Ground state density and bands                  |
| Functional                                | LDA (Perdew-Zunger)           | Exchange-Correlation functional                 |
| Pseudopotentials                          | *.pz-vbc.UPF                  | Norm-conserving (VBC)                           |
| Wavefunction Cutoff ( $E_{cut}^{wfc}$ )   | 120 Ry                        | Plane-wave basis cutoff                         |
| Charge Density Cutoff ( $E_{cut}^{rho}$ ) | 480 Ry                        | Charge density basis cutoff                     |
| k-point Sampling                          | $3 \times 3 \times 3$         | Monkhorst-Pack grid (DFT)                       |
| Convergence Threshold                     | $1.0 \times 10^{-6}$ Ry       | SCF energy convergence criteria                 |
| Mixing Scheme                             | Thomas-Fermi (TF)             | Charge density mixing mode                      |
| Mixing Beta                               | 0.2                           | Mixing factor for SCF                           |
| GW Calculations (gww.x)                   |                               |                                                 |
| Module                                    | gww.x, head.x                 | GW approximations                               |
| Total Bands ( $N_{tot}$ )                 | 525                           | Total Kohn-Sham states included                 |
| Basis Size ( $N_{basis}$ )                | 97                            | Number of basis vectors (Principal Comp.)       |
| Fit Basis ( $N_{fit}$ )                   | 120                           | Number of fit basis vectors                     |
| Coulomb Cutoff                            | True<br>(l_truncated_coulomb) | Truncation for 2D slab geometry                 |
| Frequency Grid                            | 5 (Gauss-Legendre)            | Grid type on imaginary axis                     |
| Time/Freq Points                          | 97                            | Number of points on imaginary axis              |
| Imaginary Time Range ( $\tau$ )           | 9.8 a.u.                      | Max imaginary time                              |
| Energy Cutoff ( $\omega$ )                | 20.0 Ry                       | Basis energy cutoff                             |
| Head Calculation                          | Included<br>(l_head=.true.)   | Dielectric head ( $q \rightarrow 0$ ) treatment |
| Phonon / Dielectric (ph.x)                |                               |                                                 |
| k-point Sampling                          | $2 \times 2 \times 2$         | Coarser grid for response calculation           |

|                                      |                                 |                                          |
|--------------------------------------|---------------------------------|------------------------------------------|
| <b>Convergence</b> ( <i>tr2_ph</i> ) | $1.0 \times 10^{-7} \text{ Ry}$ | Threshold for phonon/response            |
| <b>Born Eff. Charges</b>             | True (zeu)                      | Calculated for IR intensities            |
| <b>Dielectric Matrix</b>             | True (epsil)                    | Calculated macroscopic dielectric const. |
| <b>Optical Properties (simple)</b>   |                                 |                                          |
| <b>Method</b>                        | IPA / GW-BSE                    | Independent Particle / BSE approx.       |
| <b>Valence Bands</b> ( $N_v$ )       | 420                             | Number of valence bands in sum           |
| <b>Conduction Bands</b> ( $N_c$ )    | 105                             | Number of conduction bands in sum        |
| <b>Energy Range</b> ( $E_{max}$ )    | 1.1 Ry ( $\sim 15$ eV)          | Max energy for optical spectrum          |
| <b>Broadening</b>                    | 0.0142 Ry<br>( $\sim 0.19$ eV)  | Inter/Intra-band Lorentzian broadening   |
| <b>Smearing Type</b>                 | Fermi-Dirac (-99)               | Smearing method                          |
| <b>Smearing Width</b>                | 0.02205 Ry<br>( $\sim 0.3$ eV)  | Electronic temperature for optics        |
| <b>Interpolation</b>                 | True (4x4x4 grid)               | Non-local commutator interpolation       |

---
